# Supplementary material for: A Free Amino Acid Diet Alleviates Colorectal Tumorigenesis through Modulating Gut Microbiota and Metabolites
Source: MDPI journal article supplement (doi:10.3390/nu16071040), 2024-04-03
Supplement: s1 [file s1]

**Table S1 The diet composition**

|                       | L-AA Defined AIN-93G |         | AIN-93G            |        |         |
|-----------------------|----------------------|---------|--------------------|--------|---------|
|                       | gm%                  | kcal%   |                    | gm%    | kcal%   |
| Protein               | 18.00%               | 18.20%  | Protein            | 20.30% | 20.30%  |
| Carbohydrate          | 65.50%               | 66.00%  | Carbohydrate       | 63.95% | 63.95%  |
| Fat                   | 7.00%                | 15.90%  | Fat                | 7.00%  | 15.75%  |
| Total                 |                      | 100.00% | Total              |        | 100.00% |
| kcal/gm               | 3.97                 |         | kcal/gm            | 4.00   |         |
| Ingredient            | gm                   | kcal    | Ingredient         | gm     | kcal    |
| L- Arginine           | 6.3                  | 25.2    | Casein             | 200    | 800     |
| L-Histidine           | 4.5                  | 18      | L-Cystine          | 3      | 12      |
| L-Lysine HCl          | 16.1                 | 64.4    |                    |        |         |
| L-Tyrosine            | 9.2                  | 36.8    |                    |        |         |
| L-Tryptophan          | 2.1                  | 8.4     |                    |        |         |
| L-<br>Phenylalanine   | 8.7                  | 34.8    |                    |        |         |
| L-Methionine          | 4.5                  | 18      |                    |        |         |
| L-Cystine             | 3.7                  | 14.8    |                    |        |         |
| L-Threonine           | 6.6                  | 26.4    |                    |        |         |
| L-Leucine             | 15.3                 | 61.2    |                    |        |         |
| L-Isoleucine          | 8.4                  | 33.6    |                    |        |         |
| L-Valine              | 9.9                  | 39.6    |                    |        |         |
| Glycine               | 3.1                  | 12.4    |                    |        |         |
| L-Proline             | 20.4                 | 81.6    |                    |        |         |
| L-Glutamic<br>Acid    | 36.2                 | 144.8   |                    |        |         |
| L-Alanine             | 4.5                  | 18      |                    |        |         |
| L-Aspartic Acid       | 11.3                 | 45.2    |                    |        |         |
| L-Serine              | 9.4                  | 37.6    |                    |        |         |
| Total L-Amino<br>Acid | 180.2                | 720.8   |                    |        |         |
| Corn starch           | 399.9                | 1599.6  | Corn starch        | 397.5  | 1590    |
| Maltodextrin          | 145                  | 580     | Maltodextrin       | 132    | 528     |
| Sucrose               | 100                  | 400     | Sucrose            | 100    | 400     |
| Cellulose             | 50                   | 0       | Cellulose          | 50     | 0       |
| Soybean Oil           | 70                   | 630     | Soybean Oil        | 70     | 630     |
| Choline<br>Bitartrate | 2.5                  | 0       | Choline Bitartrate | 2.5    | 0       |

|                        |      |        |                     |      |      |
|------------------------|------|--------|---------------------|------|------|
| Mineral Mix<br>S10022G | 35   | 0      | Mineral Mix S10022G | 35   | 0    |
| Vitamin Mix<br>V10037  | 10   | 40     | Vitamin Mix V10037  | 10   | 40   |
| Sodium<br>Bicarbonate  | 7.4  | 0      |                     |      |      |
| Total                  | 1000 | 3970.4 | Total               | 1000 | 4000 |

**Table S2 Differential Gene Expression Analysis**

| Gene ID   | Gene Symbol   | Log2FC      | Qvalue      | Expression |
|-----------|---------------|-------------|-------------|------------|
| 100041596 | Gal3st2b      | 1.714988801 | 0.0488955   | Up         |
| 100061    | Lrrc19        | 1.10166328  | 9.48E-04    | Up         |
| 100763    | Ube3c         | 0.46134953  | 4.06E-04    | Up         |
| 100986    | Akap9         | 0.567304175 | 0.008332666 | Up         |
| 102633156 | Gm4631        | 3.85380332  | 0.014566529 | Up         |
| 102680    | Slc6a20a      | 1.703151272 | 5.33E-04    | Up         |
| 104263    | Kdm3a         | 0.434531237 | 0.022999129 | Up         |
| 105244158 | 1700024J04Rik | 1.924811915 | 1.95E-04    | Up         |
| 105244931 | Gm40453       | 2.572830359 | 8.95E-04    | Up         |
| 105440    | Kctd9         | 0.440858521 | 0.00302005  | Up         |
| 106583    | Scaf8         | 0.359348581 | 0.003905969 | Up         |
| 107035    | Fbxo38        | 0.395985056 | 4.88E-07    | Up         |
| 107371    | Exoc6         | 0.537907213 | 4.69E-04    | Up         |
| 107895    | Mgat5         | 0.623452183 | 7.04E-04    | Up         |
| 108017    | Fxyd4         | 4.730397294 | 0.046272555 | Up         |
| 108654    | Fam210a       | 0.32677108  | 0.013068687 | Up         |
| 109263    | Rlf           | 0.701179133 | 0.011103541 | Up         |
| 109333    | Pkn2          | 0.426238346 | 0.027424311 | Up         |
| 112407    | Egln3         | 1.156817459 | 0.001283779 | Up         |
| 11306     | Abcb7         | 0.414987392 | 0.04509765  | Up         |
| 115488029 | LOC115488029  | 1.763770864 | 0.018706587 | Up         |
| 11765     | Ap1g1         | 0.381828954 | 0.004377666 | Up         |
| 11798     | Xiap          | 0.47463572  | 0.044931394 | Up         |
| 118567641 | LOC118567641  | 0.899793292 | 0.022779793 | Up         |
| 118568652 | LOC118568652  | 1.715646342 | 1.22E-06    | Up         |
| 118568653 | LOC118568653  | 1.368516049 | 0.042937529 | Up         |
| 12013     | Bach1         | 0.673259287 | 0.006210752 | Up         |
| 12211     | Birc6         | 0.310290669 | 0.038660178 | Up         |
| 12695     | Patj          | 0.303632111 | 0.030124146 | Up         |
| 13383     | Dlg1          | 0.263658222 | 0.007861662 | Up         |
| 13521     | Slc26a2       | 1.319619234 | 0.028724885 | Up         |
| 13709     | Elf1          | 0.330925471 | 0.028724885 | Up         |
| 13714     | Elk4          | 0.95020811  | 0.031182561 | Up         |
| 14107     | Fat1          | 0.41005718  | 0.039148423 | Up         |
| 14479     | Usp15         | 0.321317376 | 0.006501409 | Up         |
| 14544     | Gda           | 1.341614041 | 4.88E-07    | Up         |
| 14675     | Gna14         | 1.154706968 | 0.00302005  | Up         |
| 14933     | Gk            | 1.790274277 | 3.26E-04    | Up         |
| 15490     | Hsd17b7       | 0.797605275 | 0.035296468 | Up         |
| 16364     | Irf4          | 1.357661918 | 0.002859531 | Up         |

|        |           |             |             |    |
|--------|-----------|-------------|-------------|----|
| 16396  | Itch      | 0.41033752  | 0.025989125 | Up |
| 16589  | Uhmk1     | 0.401387034 | 0.005002044 | Up |
| 16601  | Klf9      | 0.733221812 | 0.028724885 | Up |
| 16643  | Klrd1     | 1.348419201 | 0.042937529 | Up |
| 16780  | Lamb3     | 0.291235842 | 4.69E-04    | Up |
| 17126  | Smad2     | 0.430370514 | 0.001863304 | Up |
| 17128  | Smad4     | 0.665022241 | 0.0167029   | Up |
| 17295  | Met       | 0.775243298 | 0.026800914 | Up |
| 17356  | Afdn      | 0.347576229 | 0.014566529 | Up |
| 17847  | Usp34     | 0.472479812 | 0.023075992 | Up |
| 17909  | Myo10     | 0.296604018 | 0.001863304 | Up |
| 17948  | Naip2     | 0.534427272 | 0.009394644 | Up |
| 18021  | Nfatc3    | 0.313029733 | 0.039552133 | Up |
| 18174  | Slc11a2   | 1.242495984 | 0.045059137 | Up |
| 18585  | Pde9a     | 0.797813122 | 0.0167029   | Up |
| 18607  | Pdpk1     | 0.41998834  | 0.00302005  | Up |
| 18700  | Piga      | 0.500915026 | 0.0488955   | Up |
| 18708  | Pik3r1    | 0.452479588 | 0.011392109 | Up |
| 19087  | Prkar2a   | 0.52412618  | 5.33E-04    | Up |
| 19260  | Ptpn22    | 1.53062026  | 0.00781177  | Up |
| 19271  | Ptprj     | 0.579452574 | 0.022779793 | Up |
| 19272  | Ptprk     | 0.35579751  | 0.043440155 | Up |
| 192786 | Rapgef6   | 0.411050859 | 0.041427534 | Up |
| 19386  | Ranbp2    | 0.465552042 | 0.035936508 | Up |
| 19766  | Ripk1     | 0.289029544 | 0.001711529 | Up |
| 20278  | Scnn1g    | 4.452967713 | 2.04E-09    | Up |
| 20338  | Sel1l     | 0.328286207 | 0.040248805 | Up |
| 20384  | Srsf5     | 0.300200406 | 0.022961417 | Up |
| 20393  | Sgk1      | 1.474897162 | 0.022779793 | Up |
| 20658  | Son       | 0.366879457 | 0.042841322 | Up |
| 20683  | Sp1       | 0.368148391 | 0.00375101  | Up |
| 20717  | Serpina3m | 3.983814826 | 0.004359487 | Up |
| 207214 | Larp4     | 0.540628924 | 0.026800914 | Up |
| 207304 | Hectd1    | 0.424158208 | 0.010908776 | Up |
| 208618 | Etl4      | 0.410036586 | 0.047249558 | Up |
| 211673 | Arfgef1   | 0.375801312 | 0.02332722  | Up |
| 212285 | Arap2     | 0.774179488 | 0.024660227 | Up |
| 212391 | Lcor      | 0.3369195   | 0.031182561 | Up |
| 212442 | Lactb2    | 0.40994715  | 0.011911087 | Up |
| 212728 | Tarbp1    | 0.736454855 | 0.013541765 | Up |
| 215335 | Slc36a1   | 1.240204113 | 0.012179448 | Up |
| 216238 | Eea1      | 0.656542702 | 0.035936508 | Up |
| 217030 | Synrg     | 0.313092001 | 0.009371183 | Up |

|        |               |             |             |    |
|--------|---------------|-------------|-------------|----|
| 217980 | Larp4b        | 0.44195957  | 7.01E-04    | Up |
| 21872  | Tjp1          | 0.501075152 | 0.005785178 | Up |
| 21888  | Tle4          | 0.96240124  | 4.40E-05    | Up |
| 218914 | Wapl          | 0.383940986 | 0.035936508 | Up |
| 22026  | Nr2c2         | 0.742482365 | 6.59E-06    | Up |
| 223770 | Brd1          | 0.196166729 | 0.031182561 | Up |
| 225742 | St8sia5       | 4.780932791 | 0.025989125 | Up |
| 226641 | Atf6          | 0.48778741  | 0.007589987 | Up |
| 227231 | Cps1          | 3.092078747 | 5.04E-04    | Up |
| 227638 | Qsox2         | 0.38549133  | 0.010944415 | Up |
| 228850 | Ralgapb       | 0.287726221 | 0.024816344 | Up |
| 229731 | Slc25a24      | 0.510215667 | 0.026536814 | Up |
| 231876 | Lmtk2         | 0.364255581 | 0.025548324 | Up |
| 233789 | Smg1          | 0.563447387 | 0.043019643 | Up |
| 235320 | Zbtb16        | 1.786060046 | 4.35E-05    | Up |
| 235567 | Dnajc13       | 0.346438669 | 0.003921589 | Up |
| 235626 | Setd2         | 0.318560338 | 0.010908776 | Up |
| 238871 | Pde4d         | 0.52424924  | 0.025922347 | Up |
| 240255 | Ythdc2        | 0.601960287 | 0.031182561 | Up |
| 240283 | Dmnl1         | 0.470697899 | 0.013541765 | Up |
| 240328 | F830016B08Rik | 0.883788621 | 0.033328904 | Up |
| 242291 | Bpnt2         | 0.516366458 | 0.007225062 | Up |
| 243983 | Zdhhc13       | 0.756047101 | 0.00781177  | Up |
| 244349 | Kat6a         | 0.409984596 | 0.015350992 | Up |
| 244373 | Erlin2        | 0.280732458 | 0.049495328 | Up |
| 246103 | Atxn7         | 0.368249681 | 0.035296468 | Up |
| 268420 | Alkbh5        | 0.294654953 | 0.030124146 | Up |
| 268656 | Sptlc1        | 0.33578635  | 0.011392109 | Up |
| 268973 | Nlrc4         | 0.496946254 | 0.042937529 | Up |
| 268980 | Strn          | 0.402895263 | 0.024785686 | Up |
| 269023 | Zfp608        | 0.573974145 | 0.00302005  | Up |
| 27392  | Pign          | 0.546019869 | 0.038505872 | Up |
| 29815  | Bcar3         | 0.539033969 | 0.00302005  | Up |
| 30962  | Slc7a9        | 1.791157219 | 0.001420454 | Up |
| 317652 | Klk15         | 5.537924825 | 0.009560463 | Up |
| 319448 | Fndc3a        | 0.645239086 | 0.010823196 | Up |
| 320506 | Lmbrd2        | 0.64416625  | 0.010233818 | Up |
| 320615 | Dop1a         | 0.577483737 | 1.94E-08    | Up |
| 320727 | Ipo8          | 0.339107144 | 0.009700473 | Up |
| 329002 | Zfp236        | 0.389857408 | 7.50E-04    | Up |
| 330914 | Arhgap32      | 0.60773808  | 0.03945778  | Up |
| 332131 | Krt78         | 1.455832066 | 0.040650199 | Up |
| 381213 | Ms4a12        | 1.639128325 | 0.009951678 | Up |

|        |               |             |             |    |
|--------|---------------|-------------|-------------|----|
| 381246 | Xkr9          | 1.075411956 | 0.005002044 | Up |
| 381334 | Gal3st2       | 1.968387628 | 2.79E-04    | Up |
| 50527  | Ero1a         | 0.773088618 | 0.013541765 | Up |
| 50877  | Neu3          | 2.151621617 | 0.034839792 | Up |
| 52036  | Ppp6r3        | 0.283996049 | 0.015642638 | Up |
| 52440  | Tax1bp1       | 0.631746624 | 0.002371804 | Up |
| 53417  | Hif3a         | 1.423808321 | 0.001711529 | Up |
| 53608  | Map3k6        | 0.796698719 | 0.003883798 | Up |
| 53945  | Slc40a1       | 1.147055587 | 0.006501409 | Up |
| 544696 | Tbc1d32       | 0.504578672 | 0.039140712 | Up |
| 54608  | Abhd2         | 0.325636323 | 0.027031249 | Up |
| 54670  | Atp8b1        | 0.327427968 | 0.026579543 | Up |
| 56406  | Ncoa6         | 0.43134565  | 2.27E-06    | Up |
| 56542  | Cilk1         | 0.481567152 | 0.021465873 | Up |
| 56637  | Gsk3b         | 0.454178122 | 0.023355869 | Up |
| 56736  | Rnf14         | 0.386188969 | 0.016237965 | Up |
| 60599  | Trp53inp1     | 0.817771981 | 0.021595244 | Up |
| 619597 | Gal3st2c      | 2.413604722 | 0.033880959 | Up |
| 66222  | Serpinb1a     | 0.665435801 | 0.042937529 | Up |
| 66595  | Aste1         | 0.445727725 | 0.012111701 | Up |
| 66691  | Gapvd1        | 0.360841191 | 0.045059137 | Up |
| 667118 | Zbed6         | 1.449567453 | 0.001352913 | Up |
| 67204  | Eif2s2        | 0.850648282 | 0.013068687 | Up |
| 67300  | Cltc          | 0.507019227 | 0.012163609 | Up |
| 67974  | Ccny          | 0.344597621 | 0.00302005  | Up |
| 68142  | Ino80         | 0.419710937 | 0.025251425 | Up |
| 68473  | Mob1b         | 1.023456976 | 3.09E-04    | Up |
| 68795  | Ubr3          | 0.356832965 | 0.019244457 | Up |
| 68813  | Dock5         | 0.60885936  | 0.042937529 | Up |
| 69562  | Cdk13         | 0.345911508 | 0.025464035 | Up |
| 70349  | Copb1         | 0.360416027 | 0.00302005  | Up |
| 70351  | Ppp4r1        | 0.390477468 | 0.00302005  | Up |
| 70829  | Ccdc93        | 0.751038662 | 0.042841322 | Up |
| 71756  | Cpn2          | 3.71036958  | 0.016050948 | Up |
| 71844  | Nupl1         | 0.549731625 | 0.007870617 | Up |
| 71903  | Ces2f         | 2.651972691 | 0.010908776 | Up |
| 72503  | 2610507B11Rik | 0.333413527 | 0.042937529 | Up |
| 73288  | Vps50         | 0.398065947 | 0.026536814 | Up |
| 74006  | Dnm1l         | 0.386699871 | 0.043440155 | Up |
| 74132  | Rnf6          | 0.244397889 | 0.0208358   | Up |
| 74143  | Opa1          | 0.420253693 | 7.17E-06    | Up |
| 74388  | Dpp8          | 0.290006861 | 0.047249558 | Up |
| 74737  | Pcf11         | 0.377900276 | 0.018726474 | Up |

|        |          |              |             |      |
|--------|----------|--------------|-------------|------|
| 75420  | Secisbp2 | 0.341014024  | 0.043019643 | Up   |
| 75805  | Nln      | 0.430378425  | 0.010908776 | Up   |
| 76295  | Atp11b   | 0.442421998  | 0.043019643 | Up   |
| 76740  | Efr3a    | 0.378975129  | 0.030075334 | Up   |
| 76781  | Mettl4   | 0.514306296  | 0.040773257 | Up   |
| 76983  | Scfd1    | 0.422894962  | 0.001570418 | Up   |
| 77963  | Hook1    | 0.586943596  | 0.042937529 | Up   |
| 78937  | Avl9     | 0.791779165  | 0.008936583 | Up   |
| 80877  | Lrba     | 0.466483581  | 0.037055423 | Up   |
| 80898  | Erap1    | 0.536117219  | 0.019492742 | Up   |
| 81898  | Sf3b1    | 0.280058452  | 0.025663314 | Up   |
| 83921  | Cemip2   | 0.445056714  | 0.013068687 | Up   |
| 94192  | C1galt1  | 0.885262246  | 0.002338826 | Up   |
| 94212  | Pag1     | 1.181361969  | 0.001377421 | Up   |
| 99929  | Tiparp   | 0.731305818  | 0.002444147 | Up   |
| 100689 | Spon2    | -1.248127885 | 3.46E-08    | Down |
| 101543 | Wtip     | -0.673960481 | 0.013541765 | Down |
| 107765 | Ankrd1   | -2.226445078 | 0.039078992 | Down |
| 109959 | Amy2a5   | -3.486539732 | 0.036294033 | Down |
| 110962 | Mbd6     | -0.274676112 | 0.027424311 | Down |
| 116847 | Prelp    | -0.71351354  | 0.031182561 | Down |
| 12009  | Cep131   | -0.69160636  | 1.95E-04    | Down |
| 12798  | Cnn2     | -0.673652803 | 0.003214312 | Down |
| 13542  | Dvl1     | -0.312445033 | 0.004185172 | Down |
| 13543  | Dvl2     | -0.489492371 | 0.023706135 | Down |
| 13644  | Efs      | -0.926554022 | 0.020038706 | Down |
| 13706  | Cela2a   | -2.72677172  | 0.037055423 | Down |
| 13852  | Stx2     | -0.774950085 | 3.09E-04    | Down |
| 14114  | Fbln1    | -0.493118837 | 0.031182561 | Down |
| 14371  | Fzd9     | -1.797164902 | 0.006572642 | Down |
| 14573  | Gdnf     | -1.786066322 | 0.040248805 | Down |
| 14581  | Gfi1     | -0.701748018 | 0.015354202 | Down |
| 14588  | Gfra4    | -1.488655027 | 0.019492742 | Down |
| 15248  | Hic1     | -0.641700446 | 4.78E-05    | Down |
| 15370  | Nr4a1    | -0.964188317 | 0.024553866 | Down |
| 15396  | Hoxa11   | -0.642163856 | 1.50E-04    | Down |
| 15402  | Hoxa5    | -0.699676    | 0.034180445 | Down |
| 15404  | Hoxa7    | -0.474909905 | 0.031182561 | Down |
| 16542  | Kdr      | -0.450491603 | 0.0313254   | Down |
| 16779  | Lamb2    | -0.730306456 | 0.033706551 | Down |
| 16949  | Loxl1    | -0.842655045 | 0.029013734 | Down |
| 16950  | Loxl3    | -0.744047218 | 0.006572642 | Down |
| 16998  | Ltbp3    | -0.761464783 | 0.049572743 | Down |

|        |          |              |             |      |
|--------|----------|--------------|-------------|------|
| 170770 | Bbc3     | -0.633208311 | 0.012931574 | Down |
| 17283  | Men1     | -0.448613839 | 0.036530773 | Down |
| 17769  | Mthfr    | -0.652670631 | 1.41E-05    | Down |
| 17937  | Nab2     | -0.779850359 | 0.023075992 | Down |
| 18029  | Nfic     | -0.527924442 | 0.041659553 | Down |
| 18146  | Npdc1    | -0.419445211 | 0.041427534 | Down |
| 18515  | Pbx2     | -0.33183262  | 0.026579543 | Down |
| 18709  | Pik3r2   | -0.341580597 | 0.001711529 | Down |
| 192654 | Pla2g15  | -0.717532271 | 0.029553315 | Down |
| 19335  | Rab23    | -0.830442686 | 0.042937529 | Down |
| 19731  | Rgl1     | -0.626591264 | 0.002892641 | Down |
| 19732  | Rgl2     | -0.428961904 | 0.013685383 | Down |
| 20289  | Scx      | -1.515019712 | 0.015379441 | Down |
| 20364  | Selenow  | -0.672118585 | 0.009821046 | Down |
| 20441  | St3gal3  | -0.998000066 | 0.008763022 | Down |
| 20472  | Six2     | -3.083303469 | 0.013541765 | Down |
| 20475  | Six5     | -0.902808834 | 0.037817558 | Down |
| 20667  | Sox12    | -0.91128609  | 0.018207929 | Down |
| 20672  | Sox18    | -1.146656552 | 0.01468612  | Down |
| 207259 | Zbtb7c   | -0.573788841 | 0.001801206 | Down |
| 207792 | BC034090 | -0.930294052 | 0.024154909 | Down |
| 21412  | Tcf21    | -1.135256581 | 3.09E-05    | Down |
| 217333 | Trim47   | -0.844512733 | 0.018706587 | Down |
| 21809  | Tgfb3    | -1.082171943 | 0.040002919 | Down |
| 22021  | Tpst1    | -0.607421885 | 0.0488955   | Down |
| 22074  | Try4     | -5.01032195  | 0.028724885 | Down |
| 22368  | Trpv2    | -0.845670501 | 0.042773666 | Down |
| 223690 | Ankrd54  | -0.366823727 | 0.033328904 | Down |
| 224024 | Scarf2   | -0.821938199 | 0.007870617 | Down |
| 224116 | Muc20    | -0.688649814 | 0.024785686 | Down |
| 224697 | Adamts10 | -0.590449124 | 0.041578633 | Down |
| 226154 | Lzts2    | -0.460704235 | 0.002084455 | Down |
| 22750  | Zfp9     | -0.776917908 | 0.027698339 | Down |
| 229949 | Ak5      | -1.58030135  | 0.031182561 | Down |
| 230837 | Asap3    | -0.668385453 | 0.021595244 | Down |
| 232664 | Ccdc136  | -1.165644316 | 0.027031249 | Down |
| 234395 | Ushbp1   | -0.682274142 | 0.002338826 | Down |
| 234582 | Ccdc102a | -0.890064153 | 0.018726474 | Down |
| 23876  | Fbln5    | -0.662949221 | 0.017923079 | Down |
| 240057 | Syngap1  | -0.785150455 | 0.034180445 | Down |
| 240888 | Gpr161   | -0.998651556 | 0.00302005  | Down |
| 244654 | Mtss2    | -1.280172179 | 0.042937529 | Down |
| 269881 | Map3k10  | -0.501141349 | 0.035936508 | Down |



|        |               |              |             |      |
|--------|---------------|--------------|-------------|------|
| 27801  | Zdhhc8        | -0.72808775  | 2.57E-04    | Down |
| 319655 | Podxl2        | -1.353856665 | 0.013541765 | Down |
| 320078 | Olfml2b       | -1.078342103 | 0.021146184 | Down |
| 330790 | Hapln4        | -2.334470991 | 0.02753401  | Down |
| 442801 | Arhgef15      | -0.841814211 | 1.50E-04    | Down |
| 52163  | Camk1         | -0.379182229 | 0.029981704 | Down |
| 53412  | Ppp1r3c       | -1.124406864 | 0.033748918 | Down |
| 54201  | Zfp316        | -0.513341275 | 0.023509394 | Down |
| 56325  | Abcb9         | -0.785171383 | 0.040248805 | Down |
| 56327  | Arl2          | -0.617990482 | 0.019244457 | Down |
| 56350  | Arl3          | -0.659514157 | 0.021465873 | Down |
| 56437  | Rrad          | -1.611755864 | 2.98E-04    | Down |
| 56516  | Rbms2         | -0.373052443 | 0.00909586  | Down |
| 57265  | Fzd2          | -1.200776414 | 0.002377709 | Down |
| 59016  | Thap11        | -0.462947418 | 0.017923079 | Down |
| 59047  | Pnkp          | -0.331839634 | 0.001673839 | Down |
| 59092  | Pcbp4         | -0.695449064 | 0.013068687 | Down |
| 613123 | Ugt1a8        | -24.84142592 | 4.13E-12    | Down |
| 619441 | Tnfsfm13      | -0.993428988 | 0.024154909 | Down |
| 65086  | Lpar3         | -1.536081443 | 0.032416191 | Down |
| 65962  | Slc9a3r2      | -0.777220946 | 0.049167639 | Down |
| 66220  | Zdhhc12       | -0.479564018 | 0.048490584 | Down |
| 66473  | Ctrb1         | -4.427980191 | 0.006501409 | Down |
| 66775  | Hacd4         | -0.948197597 | 0.025706414 | Down |
| 668303 | Kif26a        | -1.487335595 | 0.009701624 | Down |
| 66873  | Tril          | -0.819734887 | 0.031182561 | Down |
| 67373  | 2210010C04Rik | -5.106666059 | 0.048008899 | Down |
| 67622  | Mxra7         | -0.772796164 | 0.044378999 | Down |
| 68106  | Nt5c3b        | -0.446652055 | 0.00595821  | Down |
| 68337  | Crip2         | -0.645711834 | 0.032416191 | Down |
| 68427  | Slc39a13      | -0.615094274 | 0.006775006 | Down |
| 68490  | Zfp579        | -0.445228295 | 0.042937529 | Down |
| 68588  | Cthrc1        | -2.381570772 | 0.013676411 | Down |
| 68632  | Myct1         | -1.232137733 | 0.001711529 | Down |
| 68767  | Washc1        | -0.376404777 | 0.01252806  | Down |
| 68794  | Flnc          | -1.826374275 | 0.029900178 | Down |
| 68977  | Haghl         | -0.524285783 | 0.018794362 | Down |
| 69060  | Pnlip         | -4.276662668 | 0.013541765 | Down |
| 69202  | Ptms          | -0.549808725 | 9.89E-08    | Down |
| 71709  | Syde1         | -0.686066158 | 0.049572743 | Down |
| 72000  | Lmntd2        | -0.449981062 | 0.043019643 | Down |
| 72446  | Prr5l         | -1.20200592  | 0.025548324 | Down |
| 73181  | Nfatc4        | -0.946183879 | 0.010973094 | Down |

|       |         |              |             |      |
|-------|---------|--------------|-------------|------|
| 73822 | Mfsd12  | -0.806476527 | 0.022779793 | Down |
| 74270 | Usp20   | -0.439438552 | 0.01199322  | Down |
| 74463 | Exoc3l2 | -1.333487839 | 1.95E-04    | Down |
| 75687 | Ripor1  | -0.491250165 | 0.042841322 | Down |
| 75871 | Zfp821  | -0.567459269 | 0.012131447 | Down |
| 78070 | Cpt1c   | -0.79558954  | 0.029981704 | Down |
| 78248 | Armcx1  | -0.637713949 | 0.029553315 | Down |
| 78408 | Fam131a | -1.11498017  | 0.029029981 | Down |
| 81799 | C1qtnf3 | -0.803059576 | 0.037824652 | Down |
| 83396 | Glis2   | -0.92594039  | 1.78E-04    | Down |
| 84113 | Ptov1   | -0.455265259 | 0.00781177  | Down |
| 97440 | B3gnt9  | -0.816991316 | 0.03516691  | Down |
| 99151 | Cercam  | -1.235249859 | 0.016644199 | Down |

**Table S3 Forward and reverse primer sequences for EGLN 3**

|                       |                        |
|-----------------------|------------------------|
| <b>Forward Primer</b> | CTGGGCAAATACTACGTCAAGG |
| <b>Reverse Primer</b> | GACCATCACCGTTGGGGTT    |
